# Supplementary material
Source: PubMed Central journal article supplement (PMC7883302)

# THE LANCET

## Gastroenterology & Hepatology

### Supplementary appendix

This appendix formed part of the original submission and has been peer reviewed.  
We post it as supplied by the 21 authors.

Supplement to: Morris EJA, Goldacre R, Spata E, et al. Impact of the COVID-19 pandemic on the detection and management of colorectal cancer in England: a population-based study. *Lancet Gastroenterol Hepatol* 2021; published online Jan 14. [https://doi.org/10.1016/S2468-1253\(21\)00005-4](https://doi.org/10.1016/S2468-1253(21)00005-4).

# Contents

|                                                                            |    |
|----------------------------------------------------------------------------|----|
| <b>Supplementary methods</b> .....                                         | 2  |
| Record selection and data extraction.....                                  | 2  |
| <b>Diagnostic Waiting Times and Activity Dataset</b> .....                 | 2  |
| Record selection and data extraction.....                                  | 2  |
| <b>Secondary Uses Service Admitted Patient Care (SUSAPC) dataset</b> ..... | 2  |
| Record selection and data extraction.....                                  | 3  |
| Data completeness and consistency in the SUSAPC data set.....              | 4  |
| <b>National Radiotherapy Dataset</b> .....                                 | 5  |
| Record selection and data extraction.....                                  | 5  |
| Data completeness and consistency in the RTDS.....                         | 5  |
| <b>Supplementary methods for subsequent analyses</b> .....                 | 6  |
| <b>References for supplementary methods</b> .....                          | 6  |
| <b>Supplementary Results</b> .....                                         | 11 |

## Supplementary methods

This section describes the methods used for the initial analyses conducted on data available up to 27 November 2020. It is intended these will be updated regularly using refreshed data and further data quality work will also continue in parallel. Any resulting methodological updates will be described at <http://www.ndph.ox.ac.uk/corectr/covid19>

### **Cancer Waiting Times**

The National Cancer Waiting Times Monitoring Dataset is captured by the NHS to fulfil the requirement to enable performance monitoring of cancer services delivered by both healthcare providers and clinical commissioning groups in England. Services are monitored in relation to targets on waiting time laid out in National Guidance, currently 93% of patients referred under a Two Week Wait should be seen within this timeframe, and 96% of patients who are diagnosed with cancer should start their treatment within 31 days of the decision to treat the patient.<sup>1</sup> The results are openly published on both a quarterly and monthly basis.<sup>1</sup>

Record selection and data extraction

Monthly figures were taken from the provider reports<sup>1</sup> on both the number of people who attended outpatient appointments within two weeks of an urgent referral by their General Practitioner (GP) for a suspected lower gastrointestinal cancer and, for any patient with cancer regardless of referral route, the numbers who started their first definitive treatment within 31 days of decision to treat.

### **Diagnostic Waiting Times and Activity Dataset**

The Diagnostics Waiting Time and Activity dataset (DM01)<sup>2</sup> captures information on the waiting times and frequency of 15 different diagnostic tests and procedures. It is openly reported and used by NHS England to measure performance against the diagnostic operation standard (which is that less than 1% of people should wait over 6 weeks for a diagnostic test). The dataset contains aggregated information submitted by providers and broken down at commissioner level examining the number of procedures undertaken, as well information around the waiting times targets.

Record selection and data extraction

Information was extracted from DM01 on all colonoscopies (the main diagnostic test for colorectal cancer) undertaken each month between January 1 2019 and October 31 2020 across England.<sup>2</sup>

### **Secondary Uses Service Admitted Patient Care (SUSAPC) dataset**

The Secondary Uses Service Admitted Patient Care (SUSAPC) dataset<sup>3</sup> is a repository of data hosted by NHS Digital that relates to in-patient care provided in England, which aims to enable reporting and analyses to support the NHS in the delivery of healthcare services. These data are submitted on

a regular basis by NHS hospital trusts at pre-arranged dates during the year. Submissions are consolidated, validated and cleaned and then incorporated into the Hospital Episode Statistics (HES) dataset.<sup>4</sup> Analyses from SUSAPC are labelled as 'management information', a term used to describe aggregate information collated and used in the normal course of business to inform operational delivery, policy development or the management of organisational performance. This recognises that data may be incomplete in places and is not quality assured to the same extent as HES.

In the SUSAPC dataset, each record contains data relating to a continuous period of care under one consultant known as a Finished Consultant Episode (FCE). Each FCE contains data about the patient (e.g. date of birth, ethnicity), the specialty providing the care (e.g. surgery), the start and end date of the continuous period of care, the diagnoses reasons (captured using International Classification of Diseases 10th revision (ICD-10) codes<sup>5</sup>) and treatments delivered (recorded using Office of Population Censuses Surveys Classification of Surgical Operations and Procedures 4th revision (OPCS4) codes<sup>6</sup> along with dates they occurred on. For this analysis, if there are adjoining multiple FCEs for an individual then that have been combined to form a spell. A spell is a continuous period of in-patient care provided by a single hospital and, in this analysis is what constitutes an 'admission'.

Record selection and data extraction

All FCEs starting between October 1 2018 and October 31 2020 and containing an ICD-10 code indicating colorectal cancer in any diagnostic position were identified. All FCEs in the same spell were considered relevant and the following data were extracted: age at admission; ethnicity; date FCE started; date FCE finished; source of the admission; method of admission; health care provider; ICD-10 diagnostic codes; and OPCS-4 procedure codes.

All admissions were included in which a colorectal cancer was recorded as a diagnosis using the ICD10 codes C18-C20. Colon cancers were deemed to be those with a C18 code whereas rectal tumours were those with either a C19 or C20 code. If individuals had multiple codes within this range across a hospital admissions then they were classed as a C188 which represents a colon cancer with an overlapping site.

Surgical procedures were identified using the OPCS4 codes listed in supplementary Table 2. The first procedure each individual in the cohort underwent was used as a surrogate for initial surgical treatment. If individuals underwent multiple procedures in the same admission then the one delivered on the earliest date was selected. If individuals underwent multiple procedures on the same day then the most extensive procedure in relation the cancer site was selected.

Laparoscopic procedures were defined as those operations with an accompanying OPCS4 code listed in Table 3 on the same date as the code indicating the procedure.

Stoma forming operations were defined by those codes listed in Table 5 and Table 4 or any operation in Table 2 with one of the codes in Table 5 recorded on the same date.

Emergency admissions and procedures were defined as those in which the admission method was classified as an emergency (i.e. where the SUSAPC ADMIMETH field did not contain 11, 12 or 13).

Analyses are limited to data submitted by NHS hospital trusts identified as having one or more colorectal cancer multidisciplinary teams or independent hospitals delivering NHS funded care.

Data completeness and consistency in the SUSAPC data set

In order to obtain the most up-to-date information about admissions with colorectal cancer, and interpret findings across the entire time period of interest, the SUSAPC data were analysed to facilitate consistency in interpretation from the earliest to the latest reported period of interest.

Underreporting of colorectal cancer diagnosis codes could mimic a real reduction in activity.

Alternatively, such under-reporting could be the result of delayed submission of SUSAPC data to NHS Digital, incomplete coding of diagnoses within submitted FCEs, or incomplete FCEs at the time of the data freeze.

Most NHS hospital trusts submit SUSAPC data on a monthly basis by a particular deadline. This follows a two-phase reconciliation process to arrive at a final agreed position for each month's activity as defined in the NHS Standard Contract. In the first phase of reconciliation, providers submit initial calendar month activity data to SUS and a snapshot of these data is taken to a fixed national deadline. A second snapshot is taken at a deadline one month later. The data freeze for the initial analyses was after the first phase reconciliation deadline for October 2020 activity, and the second phase reconciliation deadline for September 2020 activity.

To assess any bias from reduced coding activity, the numbers of all FCEs for all hospitalisations submitted with no diagnostic ICD-10 codes each month were examined and a notional adjustment was made to the absolute numbers of admissions with colorectal cancer each month (adjusted number of admissions = observed number of admissions x total number of FCEs / (total number of FCEs - number of FCEs without diagnostic codes)).

Data are only submitted when the FCE is completed (i.e. the patient has either died, been discharged, or been transferred to the care of another consultant) meaning that individuals who have been admitted but have not yet completed an FCE are not counted. As the median length of stay in which a major resection took place is 10 days this is likely to have affect case ascertainment in the data available for October and so surgical analyses are only presented up to September 2020.

## National Radiotherapy Dataset

The Radiotherapy Data Set (RTDS) collates data from all NHS providers of radiotherapy services in England to provide consistent and comparable data on radiotherapy services in England. Data are collected for all radiotherapy in the forms of teletherapy and brachytherapy (including automated remote afterloading machines) for malignant disease delivered in England to patients in NHS facilities, or in private facilities where delivery is funded by the NHS.

### Record selection and data extraction

Information was provided from the RTDS on the weekly number of new radiotherapy (excluding brachytherapy) episodes (defined as those with a new treatment start date) delivered in England within the period of Jan 1 2019 and Oct 31 2020. Only episodes in which the treatment intent was described as radical and the primary diagnosis was rectal cancer (ICD10 code C20) were included.

Episodes were then classed into long-course, short-course and other radiotherapy using the prescribed total dose and the prescribed number of fractions. Long-course radiotherapy included episodes that were 45-50.4 Gray (Gy) in 25-28 fractions, 45Gy in 20 fractions or 52-60Gy in 25 to 30 fractions. Short-course radiotherapy included episodes that were 25Gy in 5 fractions or 20Gy in 4-5 fractions. Other radiotherapy included all other remaining prescribed dose and fraction combinations and those where dose &/or fraction fields were missing.

These categorisations were based on planned prescribed dose and fraction schedules. Actual treatments delivered may have varied from these plans. Doses in Gy is given with a +/-1 tolerance to account for some adjustments when schedules were calculated. For example, a planned dose fractionation schedule of 25Gy in 5 fractions includes prescribed total doses between 24 and 26Gy. Episodes which have been created from multiple prescriptions may have sometimes contained different plans and, in these cases, the maximum prescribed dose fractionation per episode was taken.

### Data completeness and consistency in the RTDS

In June, July, August, September and October 2020, several radiotherapy centres did not submit data into RTDS. This will have resulted in under-ascertainment of the true volume of rectal radiotherapy delivered in these months so adjustments were made. This was done by determining the average monthly proportion of episodes these Centres ordinarily contributed to the national rate of use rectal radiotherapy in 2019 and then uplifting the observed rates of radiotherapy use by this proportion.

## Supplementary methods for subsequent analyses

Updates to the methods used for later analyses may be found at

<http://www.ndph.ox.ac.uk/corectr/covid19>

## References for supplementary methods

1. NHS England. NHS Improvement. Cancer Waiting Times. 2020. <https://www.england.nhs.uk/statistics/statistical-work-areas/cancer-waiting-times/> (accessed 17/10/2020 2020).
2. NHS England . Monthly diagnostic data. 2020. <https://www.england.nhs.uk/statistics/statistical-work-areas/diagnostics-waiting-times-and-activity/monthly-diagnostics-waiting-times-and-activity/monthly-diagnostics-data-2020-21/> (accessed 28/10/20 2020).
3. NHS Digital. Secondary Uses Service (SUS). 2020. <https://digital.nhs.uk/services/secondary-uses-service-sus> (accessed 24/10/2020 2020).
4. Health and Social Care Information Centre. Hospital Episode Statistics. 2015. <http://www.hscic.gov.uk/hes> (accessed 27/10/2015 2015).
5. World Health Organisation. International Statistical Classification of Diseases and Related Health Problems: ICD10. Geneva: World Health Organisation; 2004.
6. NHS Digital. National clinical coding standards: OPCS-4 (2017), accurate data for quality information. Leeds: HMSO; 2017.

Table 1: International Classification of Disease Version 10 codes used to identify colorectal cancer related hospital admissions

| Code | 3-Digit Description                         | 4-Digit Description         |
|------|---------------------------------------------|-----------------------------|
| C180 | Malignant neoplasm of colon                 | Caecum                      |
| C181 | Malignant neoplasm of colon                 | Appendix                    |
| C182 | Malignant neoplasm of colon                 | Ascending colon             |
| C183 | Malignant neoplasm of colon                 | Hepatic flexure             |
| C184 | Malignant neoplasm of colon                 | Transverse colon            |
| C185 | Malignant neoplasm of colon                 | Splenic flexure             |
| C186 | Malignant neoplasm of colon                 | Descending colon            |
| C187 | Malignant neoplasm of colon                 | Sigmoid colon               |
| C188 | Malignant neoplasm of colon                 | Overlapping lesion of colon |
| C189 | Malignant neoplasm of colon                 | Colon, unspecified          |
| C19X | Malignant neoplasm of rectosigmoid junction |                             |
| C20X | Malignant neoplasm of rectal                |                             |

Table 2: Office of Population Censuses Surveys Classification of Surgical Operations and Procedures 4th (OPCS4) revision codes used to define major resections and non-resectional surgery for colorectal cancer

| Codes | 3-Digit Description                  | 4-Digit Description                                                                                                                               |
|-------|--------------------------------------|---------------------------------------------------------------------------------------------------------------------------------------------------|
| H041  | Total excision of colon and rectum   | Panproctocolectomy and ileostomy                                                                                                                  |
| H042  | Total excision of colon and rectum   | Panproctocolectomy and anastomosis of ileum to anus and creation of pouch HFQ                                                                     |
| H043  | Total excision of colon and rectum   | Panproctocolectomy and anastomosis of ileum to anus NEC                                                                                           |
| H048  | Total excision of colon and rectum   | Other specified total excision of colon and rectum                                                                                                |
| H049  | Total excision of colon and rectum   | Unspecified total excision of colon and rectum                                                                                                    |
| H051  | Total excision of colon              | Total colectomy and anastomosis of ileum to rectum                                                                                                |
| H052  | Total excision of colon              | Total colectomy and ileostomy and creation of rectal fistula HFQ                                                                                  |
| H053  | Total excision of colon              | Total colectomy and ileostomy NEC                                                                                                                 |
| H058  | Total excision of colon              | Other specified total excision of colon                                                                                                           |
| H059  | Total excision of colon              | Unspecified total excision of colon                                                                                                               |
| H061  | Extended excision of right hemicolon | Extended right hemicolectomy and end to end anastomosis                                                                                           |
| H062  | Extended excision of right hemicolon | Extended right hemicolectomy and anastomosis of ileum to colon                                                                                    |
| H063  | Extended excision of right hemicolon | Extended right hemicolectomy and anastomosis NEC                                                                                                  |
| H064  | Extended excision of right hemicolon | Extended right hemicolectomy and ileostomy HFQ                                                                                                    |
| H065  | Extended excision of right hemicolon | Extended right hemicolectomy and end to side anastomosis                                                                                          |
| H068  | Extended excision of right hemicolon | Other specified extended excision of right hemicolon                                                                                              |
| H069  | Extended excision of right hemicolon | Unspecified extended excision of right hemicolon                                                                                                  |
| H071  | Other excision of right hemicolon    | Right hemicolectomy and end to end anastomosis of ileum to colon<br>Right hemicolectomy and side to side anastomosis of ileum to transverse colon |
| H072  | Other excision of right hemicolon    | Right hemicolectomy and anastomosis NEC                                                                                                           |
| H073  | Other excision of right hemicolon    | Right hemicolectomy and ileostomy HFQ                                                                                                             |
| H074  | Other excision of right hemicolon    | Right hemicolectomy and ileostomy HFQ                                                                                                             |
| H075  | Other excision of right hemicolon    | Right hemicolectomy and end to side anastomosis                                                                                                   |
| H078  | Other excision of right hemicolon    | Other specified other excision of right hemicolon                                                                                                 |
| H079  | Other excision of right hemicolon    | Unspecified other excision of right hemicolon                                                                                                     |
| H081  | Excision of transverse colon         | Transverse colectomy and end to end anastomosis                                                                                                   |
| H082  | Excision of transverse colon         | Transverse colectomy and anastomosis of ileum to colon                                                                                            |
| H083  | Excision of transverse colon         | Transverse colectomy and anastomosis NEC                                                                                                          |
| H084  | Excision of transverse colon         | Transverse colectomy and ileostomy HFQ                                                                                                            |



| Codes | 3-Digit Description          | 4-Digit Description                                                                                  |
|-------|------------------------------|------------------------------------------------------------------------------------------------------|
| H085  | Excision of transverse colon | Transverse colectomy and exteriorisation of bowel NEC                                                |
| H086  | Excision of transverse colon | Transverse colectomy and end to side anastomosis                                                     |
| H088  | Excision of transverse colon | Other specified excision of transverse colon                                                         |
| H089  | Excision of transverse colon | Unspecified excision of transverse colon                                                             |
| H091  | Excision of left hemicolon   | Left hemicolectomy and end to end anastomosis of colon to rectum                                     |
| H092  | Excision of left hemicolon   | Left hemicolectomy and end to end anastomosis of colon to colon                                      |
| H093  | Excision of left hemicolon   | Left hemicolectomy and anastomosis NEC                                                               |
| H094  | Excision of left hemicolon   | Left hemicolectomy and ileostomy HFQ                                                                 |
| H095  | Excision of left hemicolon   | Left hemicolectomy and exteriorisation of bowel NEC                                                  |
| H096  | Excision of left hemicolon   | Left hemicolectomy and end to side anastomosis                                                       |
| H098  | Excision of left hemicolon   | Other specified excision of left hemicolon                                                           |
| H099  | Excision of left hemicolon   | Unspecified excision of left hemicolon                                                               |
| H101  | Excision of sigmoid colon    | Sigmoid colectomy and end to end anastomosis of ileum to rectum                                      |
| H102  | Excision of sigmoid colon    | Sigmoid colectomy and anastomosis of colon to rectum                                                 |
| H103  | Excision of sigmoid colon    | Sigmoid colectomy and anastomosis NEC                                                                |
| H104  | Excision of sigmoid colon    | Sigmoid colectomy and ileostomy HFQ                                                                  |
| H105  | Excision of sigmoid colon    | Sigmoid colectomy and exteriorisation of bowel NEC                                                   |
| H106  | Excision of sigmoid colon    | Sigmoid colectomy and end to side anastomosis                                                        |
| H108  | Excision of sigmoid colon    | Other specified excision of sigmoid colon                                                            |
| H109  | Excision of sigmoid colon    | Unspecified excision of sigmoid colon                                                                |
| H111  | Other excision of colon      | Colectomy and end to end anastomosis of colon to colon NEC                                           |
| H112  | Other excision of colon      | Colectomy and side to side anastomosis of ileum to colon NEC                                         |
| H113  | Other excision of colon      | Colectomy and anastomosis NEC                                                                        |
| H114  | Other excision of colon      | Colectomy and ileostomy NEC                                                                          |
| H115  | Other excision of colon      | Colectomy and exteriorisation of bowel NEC                                                           |
| H116  | Other excision of colon      | Colectomy and end to side anastomosis NEC                                                            |
| H118  | Other excision of colon      | Other specified other excision of colon                                                              |
| H119  | Other excision of colon      | Unspecified other excision of colon                                                                  |
| H291  | Subtotal excision of colon   | Subtotal excision of colon and rectum and creation of colonic pouch and anastomosis of colon to anus |
| H292  | Subtotal excision of colon   | Subtotal excision of colon and rectum and creation of colonic pouch NEC                              |
| H293  | Subtotal excision of colon   | Subtotal excision of colon and creation of colonic pouch and anastomosis of colon to rectum          |
| H294  | Subtotal excision of colon   | Subtotal excision of colon and creation of colonic pouch NEC                                         |
| H298  | Subtotal excision of colon   | Other specified subtotal excision of colon                                                           |
| H299  | Subtotal excision of colon   | Unspecified subtotal excision of colon                                                               |
| H308  | Other operations on colon    | Other specified other operations on colon                                                            |
| H309  | Other operations on colon    | Unspecified other operations on colon                                                                |
| H331  | Excision of rectum           | Abdominoperineal excision of rectum and end colostomy                                                |
| H332  | Excision of rectum           | Proctectomy and anastomosis of colon to anus                                                         |
| H333  | Excision of rectum           | Anterior resection of rectum and anastomosis of colon to rectum using staples                        |
| H334  | Excision of rectum           | Anterior resection of rectum and anastomosis NEC                                                     |
| H335  | Excision of rectum           | Rectosigmoidectomy and closure of rectal stump and exteriorisation of bowel                          |
| H336  | Excision of rectum           | Anterior resection of rectum and exteriorisation of bowel                                            |
| H337  | Excision of rectum           | Perineal resection of rectum HFQ                                                                     |
| H338  | Excision of rectum           | Other specified excision of rectum                                                                   |

| Codes | 3-Digit Description                         | 4-Digit Description                                     |
|-------|---------------------------------------------|---------------------------------------------------------|
| H339  | Excision of rectum                          | Unspecified excision of rectum                          |
| H404  | Operations on rectum through anal sphincter | Trans-sphincteric anastomosis of colon to anus          |
| H411  | Other operations on rectum through anus     | Rectosigmoidectomy and peranal anastomosis              |
| H414  | Other operations on rectum through anus     | Peranal mucosal proctectomy and endoanal anastomosis    |
| H415  | Other operations on rectum through anus     | Peranal resection of rectum using staples               |
| H418  | Other operations on rectum through anus     | Other specified other operations on rectum through anus |
| H419  | Other operations on rectum through anus     | Unspecified other operations on rectum through anus     |
| X141  | Clearance of pelvis                         | Total exenteration of pelvis                            |
| X142  | Clearance of pelvis                         | Anterior exenteration of pelvis                         |
| X143  | Clearance of pelvis                         | Posterior exenteration of pelvis                        |
| X148  | Clearance of pelvis                         | Other specified clearance of pelvis                     |
| X149  | Clearance of pelvis                         | Unspecified clearance of pelvis                         |

Table 3: Office of Population Censuses Surveys Classification of Surgical Operations and Procedures 4th revision (OPCS4) codes used to define laparoscopic procedures

| OPCS4 Code | OPSC4 Group                        | OPSC4 Description                                         |
|------------|------------------------------------|-----------------------------------------------------------|
| Y502       | Approach through abdominal cavity  | Laparotomy approach NEC                                   |
| Y508       | Approach through abdominal cavity  | Other specified approach through abdominal cavity         |
| Y509       | Approach through abdominal cavity  | Unspecified approach through abdominal cavity             |
| Y714       | Late operations NOC                | Failed minimal access approach converted to open          |
| Y751       | Minimal access to abdominal cavity | Laparoscopically assisted approach to abdominal cavity    |
| Y752       | Minimal access to abdominal cavity | Laparoscopic approach to abdominal cavity NEC             |
| Y753       | Minimal access to abdominal cavity | Robotic minimal access approach to abdominal cavity       |
| Y754       | Minimal access to abdominal cavity | Hand assisted minimal access approach to abdominal cavity |
| Y755       | Minimal access to abdominal cavity | Laparoscopic ultrasonic approach to abdominal cavity      |
| Y758       | Minimal access to abdominal cavity | Other specified minimal access to abdominal cavity        |
| Y759       | Minimal access to abdominal cavity | Unspecified minimal access to abdominal cavity            |

Table 4: OPCS4 codes indicating major resections associated with the opening of an ileostomy/stoma

| OPCS4 code | OPSC4 Group                          | OPCS4 Description                                                                                    |
|------------|--------------------------------------|------------------------------------------------------------------------------------------------------|
| H041       | Total excision of colon and rectum   | Panproctocolectomy and ileostomy<br>Total colectomy and ileostomy and creation of rectal fistula HFQ |
| H052       | Total excision of colon              | Total colectomy and ileostomy HFQ                                                                    |
| H053       | Total excision of colon              | Total colectomy and ileostomy NEC                                                                    |
| H064       | Extended excision of right hemicolon | Extended right hemicolectomy and ileostomy HFQ                                                       |
| H074       | Other excision of right hemicolon    | Right hemicolectomy and ileostomy HFQ                                                                |
| H084       | Excision of transverse colon         | Transverse colectomy and ileostomy HFQ                                                               |
| H085       | Excision of transverse colon         | Transverse colectomy and exteriorisation of bowel NEC                                                |
| H094       | Excision of left hemicolon           | Left hemicolectomy and ileostomy HFQ                                                                 |
| H095       | Excision of left hemicolon           | Left hemicolectomy and exteriorisation of bowel NEC                                                  |
| H104       | Excision of sigmoid colon            | Sigmoid colectomy and ileostomy HFQ                                                                  |
| H105       | Excision of sigmoid colon            | Sigmoid colectomy and exteriorisation of bowel NEC                                                   |
| H114       | Other excision of colon              | Colectomy and ileostomy NEC                                                                          |
| H115       | Other excision of colon              | Colectomy and exteriorisation of bowel NEC                                                           |

| OPCS4 code | OPSC4 Group        | OPCS4 Description                                                           |
|------------|--------------------|-----------------------------------------------------------------------------|
| H331       | Excision of rectum | Abdominoperineal excision of rectum and end colostomy                       |
| H335       | Excision of rectum | Rectosigmoidectomy and closure of rectal stump and exteriorisation of bowel |
| H336       | Excision of rectum | Anterior resection of rectum and exteriorisation of bowel                   |

*Table 5: OPCS4 codes indicating the opening of a stoma*

| OPCS4 code | OPSC4 group                               | OPSC4 Description                                         |
|------------|-------------------------------------------|-----------------------------------------------------------|
| H141       | Exteriorisation of caecum                 | Tube caecostomy                                           |
| H144       | Exteriorisation of caecum                 | Appendicocaecostomy                                       |
| H148       | Exteriorisation of caecum                 | Other specified exteriorisation of caecum                 |
| H149       | Exteriorisation of caecum                 | Unspecified exteriorisation of caecum                     |
| H151       | Other exteriorisation of colon            | Loop colostomy                                            |
| H152       | Other exteriorisation of colon            | End colostomy                                             |
| H157       | Other exteriorisation of colon            | Percutaneous endoscopic sigmoid colostomy                 |
| H158       | Other exteriorisation of colon            | Other specified other exteriorisation of colon            |
| H159       | Other exteriorisation of colon            | Unspecified other exteriorisation of colon                |
| G741       | Creation of artificial opening into ileum | Creation of continent ileostomy                           |
| G742       | Creation of artificial opening into ileum | Creation of temporary ileostomy                           |
| G743       | Creation of artificial opening into ileum | Creation of defunctioning ileostomy                       |
| G748       | Creation of artificial opening into ileum | Other specified creation of artificial opening into ileum |
| G749       | Creation of artificial opening into ileum | Unspecified creation of artificial opening into ileum     |
| H328       | Exteriorisation of colon                  | Other specified exteriorisation of colon                  |
| H329       | Exteriorisation of colon                  | Unspecified exteriorisation of colon                      |

## Supplementary Results

**Supplementary Table 1:** Monthly number and percent reduction in colorectal cancer operations, by type

| Time period                | Operations |                           | Laparoscopic operations |                           | Stoma forming operations |                           | Operations following an emergency admission |                           |
|----------------------------|------------|---------------------------|-------------------------|---------------------------|--------------------------|---------------------------|---------------------------------------------|---------------------------|
|                            | N*         | Percent reduction (95%CI) | N*                      | Percent reduction (95%CI) | N*                       | Percent reduction (95%CI) | N*                                          | Percent reduction (95%CI) |
| 2019 Monthly average       | 2,003      |                           | 1,175                   |                           | 889                      |                           | 391                                         |                           |
| Jan-20                     | 2,245      | -12 (-28,2)               | 1,376                   | -17 (-37,0)               | 1,016                    | -14 (-30,-1)              | 393                                         | 0 (-17,14)                |
| Feb-20                     | 1,979      | 1 (-14,14)                | 1,193                   | -2 (-20,14)               | 865                      | 3 (-11,15)                | 348                                         | 11 (-5,25)                |
| Mar-20                     | 2,129      | -6 (-22,7)                | 1,246                   | -6 (-25,10)               | 942                      | -6 (-21,7)                | 350                                         | 11 (-5,24)                |
| Apr-20                     | 1,378      | 31 (19,42)                | 341                     | 71 (61,78)                | 773                      | 13 (0,25)                 | 304                                         | 22 (8,35)                 |
| May-20                     | 1,339      | 33 (21,43)                | 460                     | 61 (49,70)                | 741                      | 17 (4,28)                 | 374                                         | 5 (-12,19)                |
| Jun-20                     | 1,576      | 21 (8,33)                 | 683                     | 42 (28,53)                | 844                      | 5 (-9,17)                 | 450                                         | -15 (-33,1)               |
| Jul-20                     | 1,712      | 15 (1,26)                 | 870                     | 26 (10,39)                | 886                      | 0 (-14,13)                | 434                                         | -11 (-28,5)               |
| Aug-20                     | 1,662      | 17 (3,29)                 | 837                     | 29 (13,41)                | 858                      | 3 (-11,16)                | 461                                         | -18 (-36,-2)              |
| Sep-20                     | 1,913      | 4 (-10,17)                | 1,125                   | 4 (-14,19)                | 936                      | -5 (-20,8)                | 414                                         | -6 (-23,9)                |
| Oct-20                     | 1,859      | 7 (-7,20)                 | 1,131                   | 4 (-14,19)                | 845                      | 5 (-9,17)                 | 388                                         | 1 (-16,15)                |
| Apr-Oct-20 monthly average | 1,634      | 18 (13,24)                | 778                     | 34 (28,39)                | 841                      | 5 (-1,11)                 | 403                                         | -3 (-11,4)                |

\*Numbers in 2020 are adjusted using the methods described (Methods/Supplementary methods) for any reduction in submission of data

**Supplementary Table 2:** Monthly number and percent reduction in colon cancer operations, by type

| Time period                | Operations |                           | Laparoscopic operations |                           | Stoma forming operations |                           | Operations following an emergency admission |                           |
|----------------------------|------------|---------------------------|-------------------------|---------------------------|--------------------------|---------------------------|---------------------------------------------|---------------------------|
|                            | N*         | Percent reduction (95%CI) | N*                      | Percent reduction (95%CI) | N*                       | Percent reduction (95%CI) | N*                                          | Percent reduction (95%CI) |
| 2019 Monthly average       | 1,296      |                           | 786                     |                           | 325                      |                           | 306                                         |                           |
| Jan-20                     | 1,469      | -13 (-30,1)               | 937                     | -19 (-42,0)               | 373                      | -15 (-29,-2)              | 305                                         | 0 (-16,15)                |
| Feb-20                     | 1,314      | -1 (-17,12)               | 807                     | -3 (-24,15)               | 337                      | -4 (-17,8)                | 301                                         | 2 (-15,16)                |
| Mar-20                     | 1,397      | -8 (-24,6)                | 829                     | -6 (-27,12)               | 362                      | -11 (-25,1)               | 277                                         | 10 (-6,23)                |
| Apr-20                     | 900        | 31 (17,42)                | 221                     | 72 (60,80)                | 376                      | -16 (-30,-3)              | 244                                         | 20 (6,33)                 |
| May-20                     | 892        | 31 (18,42)                | 313                     | 60 (47,70)                | 353                      | -8 (-22,4)                | 298                                         | 3 (-14,17)                |
| Jun-20                     | 1,020      | 21 (7,33)                 | 453                     | 42 (26,55)                | 358                      | -10 (-24,2)               | 365                                         | -19 (-37,-3)              |
| Jul-20                     | 1,062      | 18 (4,30)                 | 549                     | 30 (13,44)                | 316                      | 3 (-10,14)                | 340                                         | -11 (-29,4)               |
| Aug-20                     | 1,063      | 18 (4,30)                 | 552                     | 30 (12,44)                | 341                      | -5 (-19,7)                | 365                                         | -19 (-37,-3)              |
| Sep-20                     | 1,248      | 4 (-12,17)                | 758                     | 4 (-17,20)                | 364                      | -12 (-26,0)               | 338                                         | -10 (-28,5)               |
| Oct-20                     | 1,273      | 2 (-14,15)                | 811                     | -3 (-25,14)               | 349                      | -7 (-21,5)                | 308                                         | 0 (-17,14)                |
| Apr-Oct-20 monthly average | 1,065      | 18 (12,23)                | 523                     | 33 (27,40)                | 351                      | -8 (-14,-2)               | 323                                         | -5 (-13,2)                |

\*Numbers in 2020 are adjusted using the methods described (Methods/Supplementary methods) for any reduction in submission of data

**Supplementary Table 3:** Monthly number and percent reduction in rectal cancer operations, by type

| Time period                | Operations |                           | Laparoscopic operations |                           | Stoma forming operations |                           | Operations following an emergency admission |                           |
|----------------------------|------------|---------------------------|-------------------------|---------------------------|--------------------------|---------------------------|---------------------------------------------|---------------------------|
|                            | N*         | Percent reduction (95%CI) | N*                      | Percent reduction (95%CI) | N*                       | Percent reduction (95%CI) | N*                                          | Percent reduction (95%CI) |
| 2019 Monthly average       | 707        |                           | 389                     |                           | 564                      |                           | 85                                          |                           |
| Jan-20                     | 776        | -10 (-28,6)               | 439                     | -13 (-35,6)               | 643                      | -14 (-33,2)               | 88                                          | -3 (-26,15)               |
| Feb-20                     | 665        | 6 (-11,20)                | 386                     | 1 (-20,18)                | 528                      | 6 (-11,21)                | 47                                          | 45 (28,58)                |
| Mar-20                     | 732        | -3 (-21,11)               | 417                     | -7 (-28,11)               | 581                      | -3 (-21,12)               | 73                                          | 15 (-6,31)                |
| Apr-20                     | 478        | 32 (18,44)                | 120                     | 69 (57,78)                | 398                      | 29 (15,42)                | 60                                          | 30 (11,45)                |
| May-20                     | 447        | 37 (23,48)                | 147                     | 62 (49,72)                | 388                      | 31 (17,43)                | 76                                          | 11 (-10,28)               |
| Jun-20                     | 556        | 21 (6,34)                 | 230                     | 41 (25,54)                | 486                      | 14 (-3,28)                | 85                                          | 0 (-22,19)                |
| Jul-20                     | 650        | 8 (-8,22)                 | 321                     | 18 (-1,33)                | 570                      | -1 (-19,14)               | 93                                          | -10 (-33,10)              |
| Aug-20                     | 599        | 15 (-1,29)                | 284                     | 27 (9,41)                 | 517                      | 8 (-8,23)                 | 96                                          | -13 (-36,7)               |
| Sep-20                     | 665        | 6 (-11,20)                | 368                     | 6 (-14,22)                | 572                      | -1 (-19,14)               | 77                                          | 10 (-11,27)               |
| Oct-20                     | 586        | 17 (1,30)                 | 320                     | 18 (-1,33)                | 496                      | 12 (-4,26)                | 80                                          | 6 (-16,24)                |
| Apr-Oct-20 monthly average | 879        | -24 (-33,-16)             | 256                     | 34 (28,40)                | 489                      | 13 (6,20)                 | 81                                          | 5 (-4,13)                 |

\*Numbers in 2020 are adjusted using the methods described (Methods/Supplementary methods) for any reduction in submission of data

### Supplementary Figure 1: Monthly number and proportion of operations for colorectal, colonic and rectal cancer that were undertaken laparoscopically

The mean monthly number (and +/- one standard deviation (SD)) of laparoscopic operations in 2019 is plotted alongside the monthly counts for both 2019 and 2020 in connected line graphs in which vertical lines represent 1 SD for monthly counts or proportions. The 2020 rate is based on counts adjusted for incomplete coding (see methods/supplementary methods).

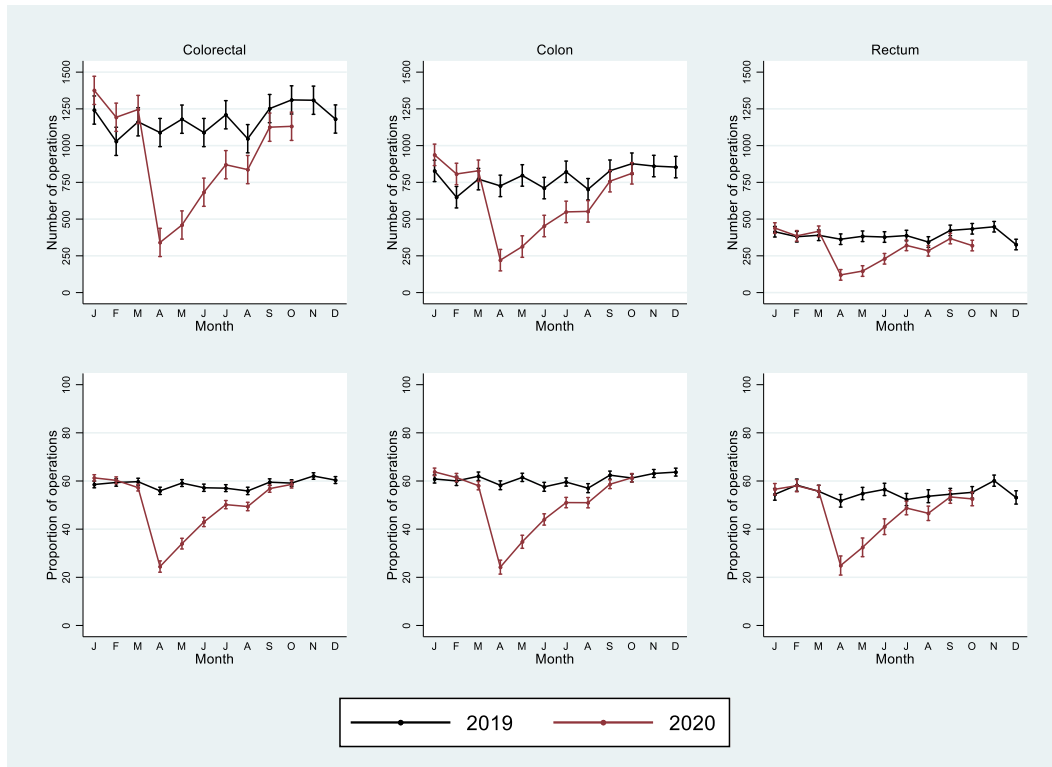



**Supplementary Figure 2: Monthly number and proportion of operations for colorectal, colonic and rectal cancer that led to the formation of a stoma**

Symbols and conventions as in Supplementary Figure 1. The 2020 rate is based on counts adjusted for incomplete coding (see methods/supplementary methods).

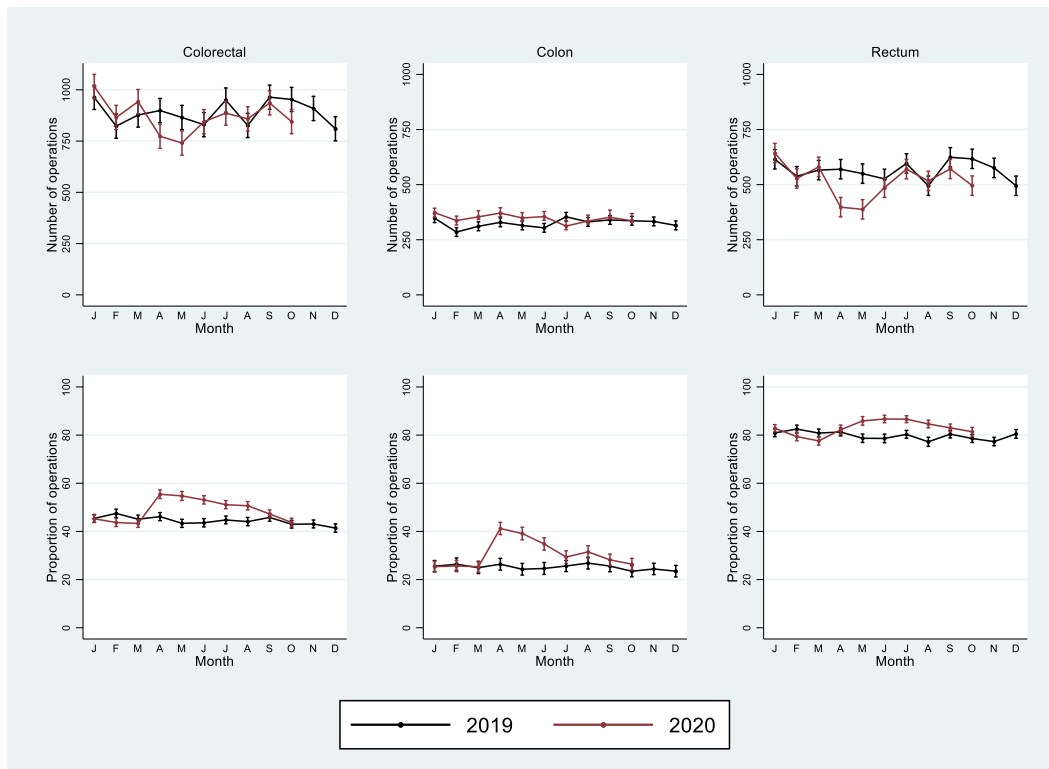

**Supplementary Figure 3: Monthly number and proportion of operations for colorectal, colonic and rectal cancer that were undertaken following an emergency admission**

Symbols and conventions as in Supplementary Figure 1. The 2020 rate is based on counts adjusted for incomplete coding (see methods/supplementary methods).

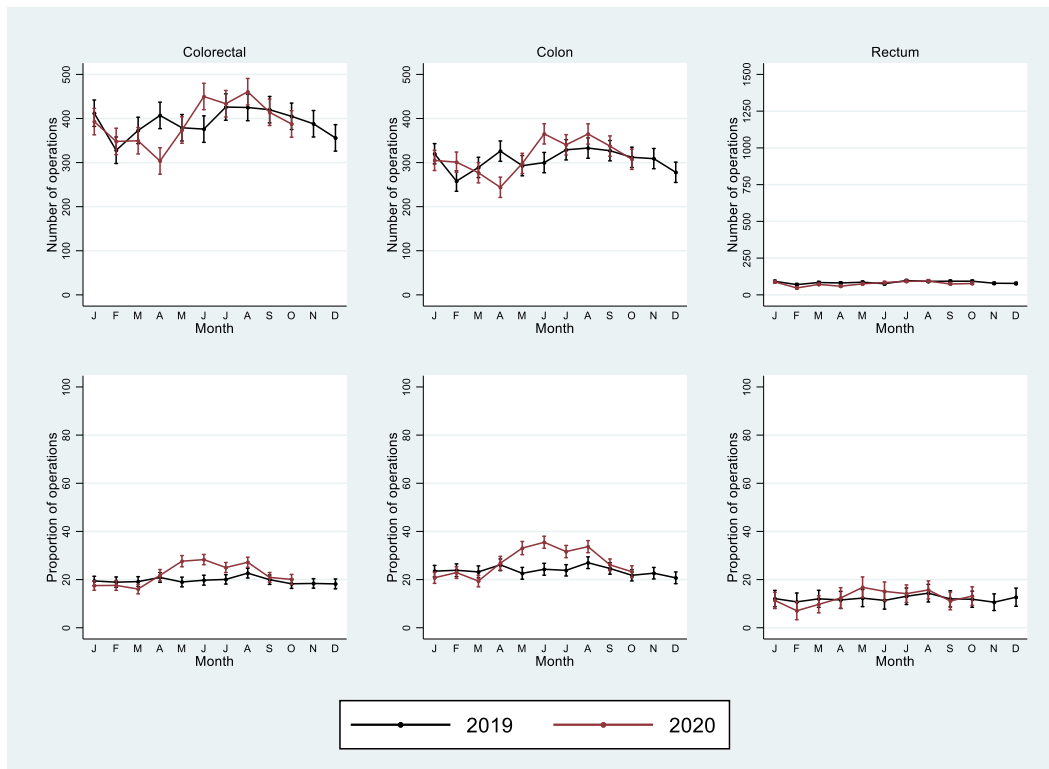

Supplement: mmc1.pdf [file mmc1.pdf]
